# Supplementary material for: Uncommon radiologic computed tomography appearances of the chest in patients with lymphangioleiomyomatosis
Source: PubMed Central journal article supplement (PMC8010110; doi:10.1038/s41598-021-85999-5), 2021-03-30
Supplement: 41598_2021_85999_MOESM1_ESM.pdf [file 41598_2021_85999_MOESM1_ESM.pdf]

## Supplementary Information

### Uncommon radiologic computed tomography appearances of the chest in patients with lymphangioleiomyomatosis

Yasuhito Sekimoto<sup>1,4</sup>, Kazuhiro Suzuki<sup>2,4</sup>, Makiko Okura<sup>1,4</sup>, Takuo Hayashi<sup>3,4</sup>, Hiroki Ebana<sup>4,5</sup>, Toshio Kumasaka<sup>4,6</sup>, Keiko Mitani<sup>1,4</sup>, Koichi Nishino<sup>1,4</sup>, Shouichi Okamoto<sup>1,4</sup>, Etsuko Kobayashi<sup>1,4</sup>, Kazuhisa Takahashi<sup>1</sup> and Kuniaki Seyama<sup>1,4</sup>

Divisions of Respiratory Medicine<sup>1</sup>, Radiology<sup>2</sup>, and Human Pathology<sup>3</sup>, Juntendo University Faculty of Medicine and Graduate School of Medicine; 3-1-3 Hongo, Bunkyo-ku, Tokyo 113-8431, Japan

The Study Group for Pneumothorax and Cystic Lung Diseases<sup>4</sup>; 4-8-1 Seta, Setagaya-Ku, Tokyo 158-0095, Japan

Department of Respiratory and Cardiovascular Surgery<sup>5</sup>, Tokyo Metropolitan Bokuto Hospital; 4-23-15 Kotobashi, Sumida-ku, Tokyo 130-8575, Japan

Department of Pathology<sup>6</sup>, Japanese Red Cross Medical Center; 4-1-22 Hiroo, Shibuyaku, Tokyo 150-8935, Japan

#### Corresponding author:

Yasuhito Sekimoto, M.D.

Division of Respiratory Medicine, Juntendo University Faculty of Medicine and Graduate School of Medicine; 3-1-3 Hongo, Bunkyo-ku, Tokyo 113-8431, Japan

e-mail: y-sekimo@juntendo.ac.jp

**Table S1. Clinical features of LAM patients stratified by HRCT finding**

| HRCT Findings                                                    | n          | Histologic Dx<br>n (%) | Clinical Dx<br>n (%) | Age at presentation |                     |                        | Pneumothorax<br>n (%)  |
|------------------------------------------------------------------|------------|------------------------|----------------------|---------------------|---------------------|------------------------|------------------------|
|                                                                  |            |                        |                      | Mean(y)             | Median<br>(Range)   | ≥50<br>n (%)           |                        |
| <b>All patients</b>                                              | <b>311</b> | <b>216 (69.5)</b>      | <b>95 (30.5)</b>     | <b>39.1</b>         | <b>38 (19 - 71)</b> | <b>45 (14.5)</b>       | <b>119 (38.3)</b>      |
| S-LAM                                                            | 272        | 200 (73.5)             | 72 (26.5)            | 39.2                | 38 (19 - 71)        | 39 (14.3)              | 112 (41.2)             |
| TSC-LAM                                                          | 39         | 16 (41.0)              | 23 (59.0)            | 38.3                | 36 (21 - 66)        | 6 (15.4)               | 7 (18.4)               |
| <b>Cyst appearance</b>                                           |            |                        |                      |                     |                     |                        |                        |
| Common appearance alone                                          | 254        | 165 (65.0)             | 89 (35.0)            | 39.0                | 38 (22 - 67)        | 33 (13.0)              | 75 (29.5)              |
| S-LAM                                                            | 223        | 155 (69.5)             | 68 (30.5)            | 38.9                | 38 (22 - 67)        | 28 (12.6)              | 75 (33.6)              |
| TSC-LAM                                                          | 31         | 10 (32.2)              | 21 (67.7)            | 39.9                | 38 (24 - 66)        | 5 (16.1)               | 0 (0.0)                |
| Common appearance +<br>large cysts*                              | 52         | 46 (88.5)              | 6 (11.5)             | 39.4                | 36 (19 - 71)        | 12 (23.1) <sup>¶</sup> | 42 (80.8) <sup>§</sup> |
| S-LAM                                                            | 44         | 40 (90.9)              | 4 (19.1)             | 40.7                | 38 (19 - 71)        | 11 (25.0)              | 35 (79.6)              |
| TSC-LAM                                                          | 8          | 6 (75.0)               | 2 (25.0)             | 32.3                | 32.5 (21 - 52)      | 1 (12.5)               | 7 (87.5)               |
| Common appearance +<br>cysts with irregularly<br>thickened walls | 2          | 2 (100.0)              | 0 (0)                | NA                  | 29, 33 <sup>†</sup> | 0                      | 0                      |
| S-LAM                                                            | 2          | 2 (100.0)              | 0 (0)                | NA                  | 29, 33 <sup>§</sup> | 0                      | 0                      |
| TSC-LAM                                                          | 0          | 0 (0)                  | 0 (0)                | NA                  | NA                  | 0                      | 0                      |

|                                                          |    |           |          |      |                     |          |          |
|----------------------------------------------------------|----|-----------|----------|------|---------------------|----------|----------|
| Multiple thin-walled cysts,<br>mostly large              | 2  | 2 (100.0) | 0 (0)    | NA   | 38, 43 <sup>†</sup> | 0        | 2        |
| S-LAM                                                    | 2  | 2 (100.0) | 0 (0)    | NA   | 38, 43 <sup>†</sup> | 0        | 2        |
| TSC-LAM                                                  | 0  | 0 (0)     | 0 (0)    | NA   | NA                  | 0        | 0        |
| Multiple thin-walled cysts,<br>mostly irregularly shaped | 1  | 1 (100.0) | 0 (0)    | NA   | 27 <sup>†</sup>     | 0        | 0        |
| S-LAM                                                    | 1  | 1 (100.0) | 0 (0)    | NA   | 27 <sup>†</sup>     | 0        | 0        |
| TSC-LAM                                                  | 0  | 0 (0)     | 0 (0)    | NA   | NA                  | 0        | 0        |
| <b>Findings in addition to cysts</b>                     |    |           |          |      |                     |          |          |
| Lymphatic congestion                                     | 24 | 21 (87.5) | 3 (12.5) | 40.5 | 38.5 (27 - 58)      | 4 (16.7) | 3 (12.5) |
| S-LAM                                                    | 20 | 18 (90.0) | 2 (10.0) | 40.3 | 38.5 (30 - 58)      | 3 (15.0) | 3 (15.0) |
| TSC-LAM                                                  | 4  | 3 (75.0)  | 1 (25.0) | 41.5 | 41.5 (27 - 56)      | 1 (25.0) | 0        |
| Diffuse noncalcified<br>nodules                          | 6  | 6 (100.0) | 0 (0)    | 38.8 | 33.5 (32 - 51)      | 2 (33.3) | 3 (50.0) |
| S-LAM                                                    | 6  | 6 (100.0) | 0 (0)    | 38.8 | 33.5 (32 - 51)      | 2 (33.3) | 3 (50.0) |
| TSC-LAM                                                  | 0  | 0 (0)     | 0 (0)    | NA   | NA                  | 0        | 0        |
| TSC-related findings                                     |    |           |          |      |                     |          |          |
| Rounded ground-glass<br>opacities suggestive of<br>MMPH  | 15 | 6 (40.0)  | 9 (60.0) | 36.9 | 33 (28 - 66)        | 1 (6.7)  | 2 (13.3) |
| S-LAM                                                    | 1  | 1 (100.0) | 0 (0)    | NA   | 32 <sup>†</sup>     | 0        | 0        |

|                       |    |           |           |      |                |           |           |
|-----------------------|----|-----------|-----------|------|----------------|-----------|-----------|
| TSC-LAM               | 14 | 5 (35.7)  | 9 (64.2)  | 37.5 | 34 (28 - 66)   | 1 (7.1)   | 2 (14.3)  |
| Myocardial fatty foci | 26 | 11 (42.3) | 15 (57.6) | 40.7 | 37 (21 - 66)   | 7 (26.9)  | 7 (26.9)  |
| S-LAM                 | 8  | 6 (75.0)  | 2 (25.0)  | 45.3 | 49 (25 - 63)   | 4 (50.0)  | 3 (37.5)  |
| TSC-LAM               | 18 | 5 (27.8)  | 13 (72.2) | 38.6 | 36.5 (21 - 66) | 3 (16.7)  | 4 (22.2)  |
| Bone nodules          | 60 | 29 (48.3) | 31 (51.6) | 39.3 | 37 (21 - 67)   | 10 (16.7) | 16 (26.7) |
| S-LAM                 | 28 | 17 (60.7) | 11 (39.3) | 41.6 | 41 (29 - 67)   | 6 (21.4)  | 10 (35.7) |
| TSC-LAM               | 32 | 12 (37.5) | 20 (62.5) | 37.2 | 34.5 (21 - 66) | 4 (12.5)  | 6 (18.8)  |

\*Large cysts are those > 2 cm

†Indicates the age(s) at presentation when only 1-2 patients had the finding.

¶ $P=0.0809$ , compared to all patients (Fisher's exact test).

§ $P<0.0001$ , compared to all patients (Fisher's exact test).

Indicates the age(s) at presentation when only 1-2 patients had the finding.

Abbreviations: Dx = diagnosis; NA = not applicable; LAM = lymphangioliomyomatosis; MMPH = multifocal micronodular pneumocyte hyperplasia; S-LAM = sporadic LAM; TSC-LAM = tuberous sclerosis complex-associated LAM; y = years of age
